# Supplementary material
Source: Springer Nature journal article supplement (https://www.springermedizin.de/resource/supplementary/12936_2014_3243_MOESM4_ESM.pdf/9545450)

**AUC<sub>Deoxy-QHS</sub>/AUC<sub>QHS</sub>**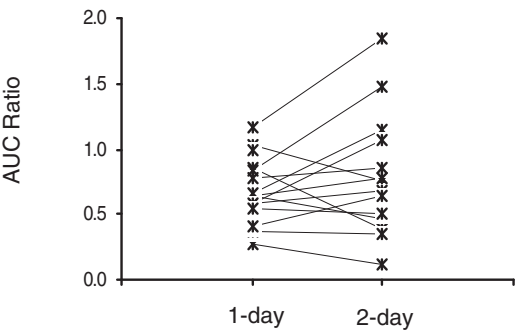**AUC<sub>M1</sub>/AUC<sub>QHS</sub>**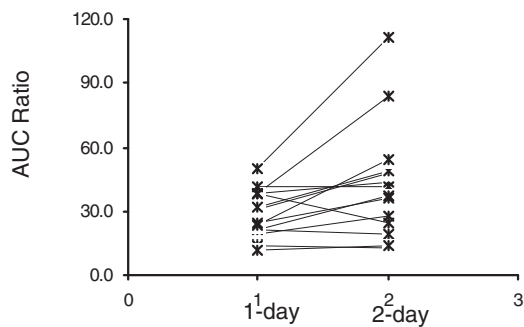**AUC<sub>M2</sub>/AUC<sub>QHS</sub>**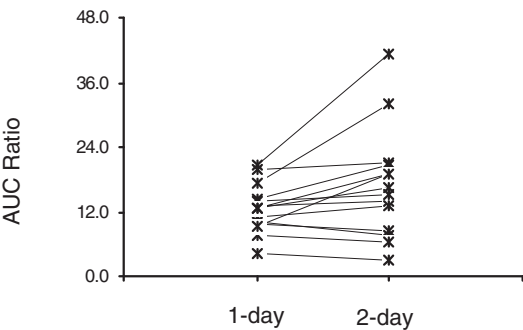**AUC<sub>M3</sub>/AUC<sub>QHS</sub>**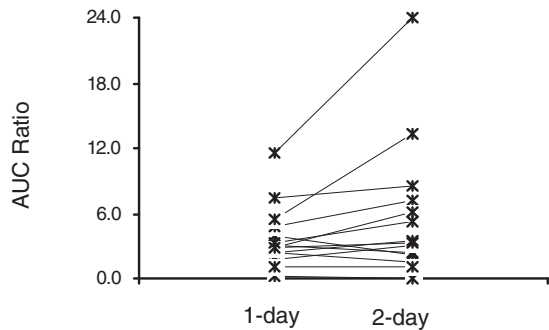

Supplement: MOESM4 [file 9545450]
